# Supplementary material
Source: PubMed Central journal article supplement (PMC3957608)
Supplement: AEM.03393-13_zam999105173so1.pdf [file AEM.03393-13_zam999105173so1.pdf]

# SUPPLEMENT

**Supplemental Figure 1:** Phylogram of *Campylobacter* isolated from American crows that may form their own clade with close relative *C. jejuni* subsp. *jejuni* 81116. Lines beginning with 4840B and 4540B were all isolated from crows from this study along with the rest of the crow isolates, which are all shown in bold.

Distance is indicated by scale bar.

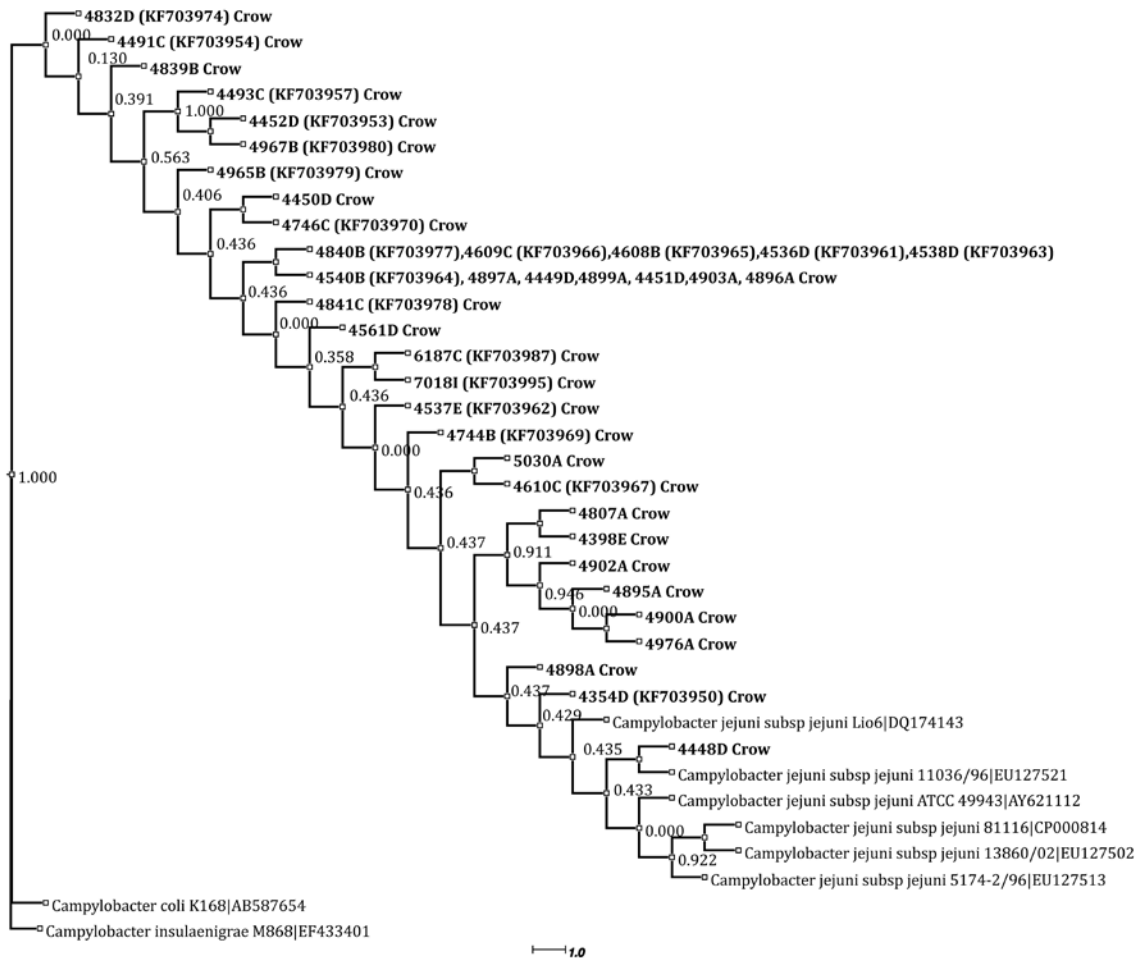

**Supplement Table 1:** *Campylobacter* isolate numbers and corresponding NCBI GenBank Accession

numbers

| <b>Isolate</b> | <b>NCBI Accession number</b> |
|----------------|------------------------------|
| 4354D          | KF703950                     |
| 4355B          | KF703951                     |
| 4393D          | KF703952                     |
| 4452D          | KF703953                     |
| 4491C          | KF703954                     |
| 4492E          | KF703955                     |
| 4493B          | KF703956                     |
| 4493C          | KF703957                     |
| 4494B          | KF703958                     |
| 4495C          | KF703959                     |
| 4535B          | KF703960                     |
| 4536D          | KF703961                     |
| 4537E          | KF703962                     |
| 4538D          | KF703963                     |
| 4540B          | KF703964                     |
| 4608B          | KF703965                     |
| 4609C          | KF703966                     |
| 4610C          | KF703967                     |
| 4743C          | KF703968                     |
| 4744B          | KF703969                     |
| 4746C          | KF703970                     |
| 4747B          | KF703971                     |
| 4749B          | KF703972                     |
| 4751B          | KF703973                     |
| 4832D          | KF703974                     |
| 4839B.1        | KF703975                     |
| 4839B.2        | KF703976                     |
| 4840B          | KF703977                     |
| 4965B          | KF703979                     |
| 4841C          | KF703978                     |
| 4967B          | KF703980                     |
| 5118C          | KF703981                     |
| 5120B          | KF703982                     |
| 5121B          | KF703983                     |
| 5335B          | KF703984                     |
| 5335C          | KF703985                     |
| 5758B          | KF703986                     |
| 6187C          | KF703987                     |
| 6825B          | KF703988                     |
| 6825H          | KF703989                     |
| 69948          | KF703990                     |
| 6994C          | KF703991                     |
| 7018A          | KF703992                     |
| 7018B          | KF703993                     |
| 7018C          | KF703994                     |
| 7018I          | KF703995                     |

|        |          |
|--------|----------|
| 6825G  | KF703996 |
| 48-UCD | KF703997 |
| 49-UCD | KF703998 |
| 4450D  | KF923691 |
| 4897A  | KF923692 |
| 4896A  | KF923693 |
| 4449D  | KF923694 |
| 4899A  | KF923695 |
| 4451D  | KF923696 |
| 4903A  | KF923697 |
| 4561D  | KF923698 |
| 5030A  | KF923699 |
| 4807A  | KF923700 |
| 4398E  | KF923701 |
| 4902A  | KF923702 |
| 4895A  | KF923703 |
| 4900A  | KF923704 |
| 4976A  | KF923705 |
| 4898A  | KF923706 |
| 4448D  | KF923707 |
| 4774A  | KF923708 |
| 4562C  | KF923709 |
| 4394D  | KF923710 |
| 4527D  | KF923711 |

**Supplement Table 2:** GenBank reference sequences used in phylogenetic analysis

| <b>Campylobacter References</b>                                     | <b>Accession Number</b> |
|---------------------------------------------------------------------|-------------------------|
| <i>Campylobacter coli</i> K168                                      | AB587654                |
| <i>Campylobacter jejuni</i> subsp. <i>jejuni</i> strain Lio6        | DQ174143                |
| <i>Campylobacter jejuni</i> subsp. <i>jejuni</i> strain 11036/96    | EU127521                |
| <i>Campylobacter jejuni</i> subsp. <i>jejuni</i> strain 10626/04    | EU127537                |
| <i>Campylobacter jejuni</i> subsp. <i>jejuni</i> strain 11281/04    | EU127548                |
| <i>Campylobacter jejuni</i> subsp. <i>jejuni</i> strain ATCC 49943  | AY621112                |
| <i>Campylobacter jejuni</i> subsp. <i>jejuni</i> 81116              | CP000814                |
| <i>Campylobacter jejuni</i> subsp. <i>jejuni</i> M1                 | CP001900                |
| <i>Campylobacter jejuni</i> subsp. <i>jejuni</i> ICDCJ07001         | CP002029                |
| <i>Campylobacter jejuni</i> subsp. <i>jejuni</i> 81-176             | CP000538                |
| <i>Campylobacter jejuni</i> strain ATCC 33250                       | JF747607                |
| <i>Campylobacter jejuni</i> subsp. <i>jejuni</i> 81-176             | CP000538                |
| <i>Campylobacter jejuni</i> subsp. <i>jejuni</i> NCTC 11168         | AL111168                |
| <i>Campylobacter jejuni</i> strain 100                              | GQ167670                |
| <i>Campylobacter jejuni</i>                                         | M59298                  |
| <i>Campylobacter jejuni</i> strain DSM 4688                         | HM007568                |
| <i>Campylobacter jejuni</i> strain WH11                             | AF393204                |
| <i>Campylobacter jejuni</i>                                         | CAJRRDAD/L04315         |
| <i>Campylobacter jejuni</i> strain B99/224                          | AF550629                |
| <i>Campylobacter jejuni</i> subsp. <i>jejuni</i> strain 1160-2/96   | EU127522                |
| <i>Campylobacter coli</i> strain NZ2695-96                          | DQ174137                |
| <i>Campylobacter jejuni</i> strain 98/E600/5                        | AF393202                |
| <i>Campylobacter coli</i> strain NZ900-95                           | DQ174139                |
| <i>Campylobacter jejuni</i> subsp. <i>jejuni</i> strain CCUG 10937  | DQ174141                |
| <i>Campylobacter coli</i> strain Lio8                               | DQ174135                |
| <i>Campylobacter coli</i> strain NZ4812-94                          | DQ174140                |
| <i>Campylobacter jejuni</i> strain SWUN0701                         | GQ479811                |
| <i>Campylobacter coli</i> strain NZ1905-94                          | DQ174136                |
| <i>Campylobacter coli</i> strain K99                                | AB587650                |
| <i>Campylobacter coli</i> strain 10-2                               | AB615420                |
| <i>Campylobacter coli</i> strain LMG 15884                          | AF550622                |
| <i>Campylobacter jejuni</i> strain SWUN0704                         | GQ479813                |
| <i>Campylobacter coli</i> strain X7                                 | GQ167671                |
| <i>Campylobacter jejuni</i> subsp. <i>jejuni</i> PT14               | CP003871                |
| <i>Campylobacter jejuni</i> subsp. <i>jejuni</i> strain ATCC 29428  | DQ174142                |
| <i>Campylobacter jejuni</i> strain B99/206                          | AF550630                |
| <i>Campylobacter jejuni</i> subsp. <i>jejuni</i> strain 15193/03    | EU127542                |
| <i>Campylobacter jejuni</i> strain INN-73-83 094400                 | GQ167679                |
| <i>Campylobacter lari</i>                                           | AB211985                |
| <i>Campylobacter lari</i> strain NCTC12894                          | AB181359                |
| <i>Campylobacter lari</i> subsp. <i>concheus</i> strain LMG 11760   | AF550633                |
| <i>Campylobacter lari</i> strain NZ3541-96                          | DQ174147                |
| <i>Campylobacter lari</i> subsp. <i>concheus</i> strain Bird04-CA01 | GU230875                |
| <i>Campylobacter jejuni</i> RM1221                                  | CP000025.1              |
| <i>Campylobacter jejuni</i> strain RP0001                           | GQ167656                |
| <i>Campylobacter jejuni</i> strain SWUN1202                         | GQ479819                |

|                                                                                   |            |
|-----------------------------------------------------------------------------------|------------|
| <i>Campylobacter jejuni</i> strain TGH9011                                        | TGH9011    |
| <i>Campylobacter jejuni</i> subsp. <i>jejuni</i> S3                               | CP001960   |
| <i>Campylobacter coli</i> strain K151                                             | AB587653   |
| <i>Campylobacter jejuni</i> RM1221                                                | CP000025.2 |
| <i>Campylobacter coli</i>                                                         | AF550620   |
| <i>Campylobacter jejuni</i> subsp. <i>jejuni</i> IA3902                           | CP001876   |
| <i>Campylobacter jejuni</i> subsp. <i>jejuni</i> strain 13860/02                  | EU127502   |
| <i>Campylobacter jejuni</i> subsp. <i>jejuni</i> strain 5174-2/9                  | EU127513   |
| <i>Campylobacter insulaenigrae</i> isolate M868                                   | EF433401   |
| <i>Campylobacter canadensis</i> strain L267                                       | EF621896   |
| <i>Helicobacter nemestrinae</i>                                                   | AF348617   |
| <i>Arcobacter cryaerophilus</i> strain W2-1                                       | JX392996   |
| <i>Arcobacter cryaerophilus</i> strain NW94                                       | JF915357   |
| <i>Campylobacter lanienae</i>                                                     | AY288304   |
| <i>Campylobacter hyointestinalis</i> subsp. <i>hyointestinalis</i> strain SVS3038 | AF097691   |
| <i>Campylobacter hyointestinalis</i> subsp. <i>hyointestinalis</i>                | AB301962   |
| <i>Campylobacter troglodytis</i> strain MIT 05-9156                               | EU559330   |
| <i>Campylobacter helveticus</i> strain NCTC 12472                                 | DQ174163   |
| <i>Campylobacter jejuni</i> subsp. <i>jejuni</i> strain ATCC 49943                | AY621112   |
| <i>Campylobacter cuniculorum</i> strain 120/07                                    | EU636820   |
| <i>Campylobacter ureolyticus</i> strain UNSWM                                     | GQ167669   |
| <i>Campylobacter hyointestinalis</i> subsp. <i>hyointestinalis</i> strain 0943    | AF097682   |
| <i>Campylobacter fetus</i> MGH 97-2126                                            | AF219233   |
| <i>Campylobacter concisus</i> strain ATCC 51561                                   | GQ167663   |
| <i>Campylobacter sputorum</i> strain 0403110-C0102                                | HQ628644   |
| <i>Campylobacter hominis</i> isolate 2                                            | EU781615   |
| <i>Campylobacter rectus</i> strain PW1484                                         | HQ890329   |
| <i>Campylobacter curvus</i> strain LMG 11034                                      | AF550650   |
| <i>Campylobacter showae</i> strain ATCC 51146                                     | JF747611   |
| <i>Campylobacter mucosalis</i>                                                    | L06978     |
| <i>Campylobacter jejuni</i> strain UNSW091300                                     | GQ167677   |
| <i>Campylobacter jejuni</i> strain SWUN1206                                       | GQ479822   |
| <i>Campylobacter jejuni</i> subsp. <i>jejuni</i> strain 9582/04                   | EU127536   |
| <i>Campylobacter coli</i>                                                         | L19738     |
| <i>Campylobacter coli</i> strain H99/155                                          | AF550624   |
| <i>Campylobacter coli</i> strain LMG 15883                                        | AF550621   |
| <i>Campylobacter coli</i> strain BABS091500                                       | GQ167678   |
| <i>Campylobacter lari</i> strain LMG 7607                                         | AF550631   |
| <i>Campylobacter lari</i> strain NZ145-95                                         | DQ174146   |
| <i>Campylobacter lari</i> subsp. <i>lari</i> strain LMG 14338                     | AF550634   |
| <i>Campylobacter lari</i> subsp. <i>lari</i> strain CCUG 23947                    | L04316     |
| <i>Campylobacter volucris</i> LMG 24379                                           | FM883693   |
| <i>Campylobacter peloridis</i> strain LMG 11251                                   | AF550632   |
| <i>Campylobacter jejuni</i> subsp. <i>jejuni</i> strain Lio6                      | DQ174143   |
